# Supplementary material for: Vasopressors and Inotropes in Acute Myocardial Infarction Related Cardiogenic Shock: A Systematic Review and Meta-Analysis
Source: PubMed Central journal article supplement (PMC7408805; doi:10.3390/jcm9072051), 2020-06-30
Supplement: jcm-09-02051-s001.pdf [file jcm-09-02051-s001.pdf]

## APPENDIX

### Appendix A. Search strategies.

#### MEDLINE

Database(s): Ovid MEDLINE(R) and Epub Ahead of Print, In-Process & Other Non-Indexed Citations and Daily 1946 to February 19, 2019  
 Search Strategy: 2019-02-20

| #  | Searches                                                                                                                                                                                                                                                                                                                                                       | Results       |
|----|----------------------------------------------------------------------------------------------------------------------------------------------------------------------------------------------------------------------------------------------------------------------------------------------------------------------------------------------------------------|---------------|
| 1  | shock, cardiogenic/                                                                                                                                                                                                                                                                                                                                            | 7757          |
| 2  | (cardiogen* adj9 shock*).tw,ot,kw,kf.                                                                                                                                                                                                                                                                                                                          | 10393         |
| 3  | (circulator* adj3 shock*).tw,ot,kf.                                                                                                                                                                                                                                                                                                                            | 1251          |
| 4  | coron* shock*.tw,ot,kw,kf.                                                                                                                                                                                                                                                                                                                                     | 20            |
| 5  | acute circulatory fail*.tw,ot,kw.                                                                                                                                                                                                                                                                                                                              | 247           |
| 6  | *shock/dt not (septic or sepsis or bacter*em* or infect* or endotoxin* or heat shock or HSP* or anaphyl* or allergic or vasodilat* or osmotic or h?emorr* or bleeding or toxic or neurogen* or burn* or shock-wave or shock-resistant or hypovolemic or electroconvuls* or distributive shock*).ti.                                                            | 711           |
| 7  | ((undifferent* or undiagnos* or different or various or variety or type or types or kind or kinds or forms or states or etiologies) adj2 (shock* not heat shock*)).tw.                                                                                                                                                                                         | 1662          |
| 8  | <b>or/1-7 [I = cardiogenic shock ]</b>                                                                                                                                                                                                                                                                                                                         | <b>16778</b>  |
| 9  | myocardial ischemia/ or acute coronary syndrome/ or exp myocardial infarction/ or percutaneous coronary intervention/ or angioplasty, balloon, coronary/ or myocardial revascularization/ or coronary artery bypass/                                                                                                                                           | 275348        |
| 10 | ((myocard* or heart or card* or ST) adj3 (infarct* or isch?em*)) or (coronary intervent* or STEMI or PCI or angioplast* or post-isch* or postisch* or postinfarct* or post-infarct* or MI or AMI or myocard* revasc* or coronary artery bypass* or CABG or aortocoronary bypass* or coronary bypass*).tw,ot,kf.                                                | 379295        |
| 11 | <b>9 or 10 [MI]</b>                                                                                                                                                                                                                                                                                                                                            | <b>454472</b> |
| 12 | (shock/ or shock.ti,kw.) not (electric countershock/ or (septic or sepsis or bacter*em* or infect* or endotoxin* or heat shock or HSP* or anaphyl* or allergic or vasodilat* or osmotic or h?emorr* or bleeding or toxic or neurogen* or burn* or shock-wave or shock-resistant or hypovolemic or electroconvuls* or distributive shock*).ti.) [shock general] | 30283         |
| 13 | cardiac output, low/                                                                                                                                                                                                                                                                                                                                           | 5447          |
| 14 | ((low* or diminish* or decreas* or declin* or reduc* or negligibl* or fall*) adj2 (card* or heart) adj output*).tw,kf.                                                                                                                                                                                                                                         | 8066          |
| 15 | ((low* or diminish* or decreas* or declin* or reduc* or negligibl*) adj output*).tw,kf.                                                                                                                                                                                                                                                                        | 1988          |
| 16 | cardiac output low.tw,kf,ot.                                                                                                                                                                                                                                                                                                                                   | 51            |
| 17 | (LCOS or COS or LCO).tw,ot,kw.                                                                                                                                                                                                                                                                                                                                 | 17758         |
| 18 | ((instab* or unstab*) adj1 h?emodyn*).tw,kf.                                                                                                                                                                                                                                                                                                                   | 7625          |
| 19 | <b>or/12-18 [shock, low CO]</b>                                                                                                                                                                                                                                                                                                                                | <b>69271</b>  |
| 20 | <b>11 and 19 [ II = MI + CO ]</b>                                                                                                                                                                                                                                                                                                                              | <b>8371</b>   |
| 21 | <b>8 or 20 [ I II ]</b>                                                                                                                                                                                                                                                                                                                                        | <b>20946</b>  |
| 22 | (animals/ not humans/) or (porcine or piglet or pig or pigs or rat or rats or dogs or dog or canine).ti. or ph?eochrom*.mp.                                                                                                                                                                                                                                    | 4677715       |

|    |                                                                                                                                                                                                                                                                                                                                                                                                                                                                                                                                                 |                |
|----|-------------------------------------------------------------------------------------------------------------------------------------------------------------------------------------------------------------------------------------------------------------------------------------------------------------------------------------------------------------------------------------------------------------------------------------------------------------------------------------------------------------------------------------------------|----------------|
| 23 | (review or editorial).pt. not ((case reports or clinical trial or clinical trial phase iii or clinical trial phase iv or comparative study or controlled clinical trial or evaluation studies or letter or meta analysis or randomized controlled trial).pt. or case-control studies/ or exp cohort studies/ or cross-sectional studies/ or (systematic adj3 (literature or review)).tw,ot,kf.)                                                                                                                                                 | 2590121        |
| 24 | <b>22 or 23</b>                                                                                                                                                                                                                                                                                                                                                                                                                                                                                                                                 | <b>7115287</b> |
| 25 | <b>21 not 24 [ I II - human not review,editorial]</b>                                                                                                                                                                                                                                                                                                                                                                                                                                                                                           | <b>16394</b>   |
| 26 | cardiotonic agents/tu, ad                                                                                                                                                                                                                                                                                                                                                                                                                                                                                                                       | 8559           |
| 27 | catecholamines/ad, tu                                                                                                                                                                                                                                                                                                                                                                                                                                                                                                                           | 948            |
| 28 | (cardiotonic* or inopressor* or inodilator*).tw,ot,kw.                                                                                                                                                                                                                                                                                                                                                                                                                                                                                          | 2445           |
| 29 | (catecholamines or inotropes or vasopressors or ((catecholamine or inotrop* or vasopressor) adj3 (support or solution* or infusion* or dosing or dose* or dosage* or prescri* or "use" or therap* or treat* or cotreat* or administ* or requir* or need* or superior or first-line or "add" or added or addition or adding or receiv* or receipt or regimen* or alone or combin* or plus or compar* or vs or versus or assigned or allocat* or randomi?ed or effectiveness or efficacy or drug* or agent* or substance* or group))))).tw,ot,kf. | 48357          |
| 30 | dopamine/                                                                                                                                                                                                                                                                                                                                                                                                                                                                                                                                       | 67481          |
| 31 | (dopamin* or hydroxytyramin* or Intropin*).tw,ot,kw.                                                                                                                                                                                                                                                                                                                                                                                                                                                                                            | 145939         |
| 32 | dobutamine/                                                                                                                                                                                                                                                                                                                                                                                                                                                                                                                                     | 6002           |
| 33 | dobutamin*.tw,ot,kw.                                                                                                                                                                                                                                                                                                                                                                                                                                                                                                                            | 8454           |
| 34 | noradrenaline/                                                                                                                                                                                                                                                                                                                                                                                                                                                                                                                                  | 84076          |
| 35 | (norepinephrin* or noradrenalin*).tw,ot,kw.                                                                                                                                                                                                                                                                                                                                                                                                                                                                                                     | 92575          |
| 36 | adrenaline/                                                                                                                                                                                                                                                                                                                                                                                                                                                                                                                                     | 54084          |
| 37 | (epinephrin* or adrenalin*).tw,ot,kw.                                                                                                                                                                                                                                                                                                                                                                                                                                                                                                           | 56754          |
| 38 | milrinone/                                                                                                                                                                                                                                                                                                                                                                                                                                                                                                                                      | 1316           |
| 39 | milrinon*.tw,ot,kw.                                                                                                                                                                                                                                                                                                                                                                                                                                                                                                                             | 1847           |
| 40 | vasopressins/                                                                                                                                                                                                                                                                                                                                                                                                                                                                                                                                   | 21322          |
| 41 | vasopressin*.tw,ot,kw.                                                                                                                                                                                                                                                                                                                                                                                                                                                                                                                          | 33741          |
| 42 | simendan/                                                                                                                                                                                                                                                                                                                                                                                                                                                                                                                                       | 1042           |
| 43 | (simendan or levosimend*).tw,ot,kw.                                                                                                                                                                                                                                                                                                                                                                                                                                                                                                             | 1286           |
| 44 | <b>or/26-43 [ inotropes/vasopressors ]</b>                                                                                                                                                                                                                                                                                                                                                                                                                                                                                                      | <b>378001</b>  |
| 45 | 25 and 44 [ cardiogenic shock + inotropes/vasopressors ]                                                                                                                                                                                                                                                                                                                                                                                                                                                                                        | 2050           |
| 46 | <b>remove duplicates from 45 [ cardiogenic shock + inotropes/vasopressors - deduplicated ]</b>                                                                                                                                                                                                                                                                                                                                                                                                                                                  | <b>2047</b>    |

Embase

Database(s): **Embase Classic+Embase** 1947 to 2019 February 19

Search Strategy: **2019-02-20**

| # | Searches                            | Results |
|---|-------------------------------------|---------|
| 1 | cardiogenic shock/                  | 24059   |
| 2 | (cardiogen* adj9 shock*).tw,ot,kw.  | 18652   |
| 3 | (circulator* adj3 shock*).tw,ot,kw. | 1949    |
| 4 | coron* shock*.tw,ot,kw.             | 32      |
| 5 | acute circulatory fail*.tw,ot,kw.   | 465     |

|    |                                                                                                                                                                                                                                                                                                                                                                                                                                                                       |                 |
|----|-----------------------------------------------------------------------------------------------------------------------------------------------------------------------------------------------------------------------------------------------------------------------------------------------------------------------------------------------------------------------------------------------------------------------------------------------------------------------|-----------------|
| 6  | *Shock/dt not (septic or sepsis or bacter*em* or infect* or endotoxin* or heat shock or HSP* or anaphyl* or allergic or vasodilat* or osmotic or h?emorr* or bleeding or toxic or neurogen* or burn* or shock-wave or shock-resistant or hypovolemic or electroconvuls* or distributive shock*).ti.                                                                                                                                                                   | 1157            |
| 7  | ((undifferent* or undiagnos* or different or various or variety or type or types or kind or kinds or forms or states or etiologies) adj2 (shock* not heat shock*).tw.                                                                                                                                                                                                                                                                                                 | 2735            |
| 8  | <b>or/1-7 [ I ]</b>                                                                                                                                                                                                                                                                                                                                                                                                                                                   | <b>32877</b>    |
| 9  | heart muscle ischemia/ or heart infarction/ or acute heart infarction/ or anterior myocardial infarction/ or heart infarction size/ or exp heart ventricle infarction/ or non st segment elevation myocardial infarction/ or posterior myocardial infarction/ or st segment elevation myocardial infarction/ or exp percutaneous coronary intervention/ or percutaneous transluminal angioplasty/ or coronary artery bypass graft/ or coronary artery bypass surgery/ | 547773          |
| 10 | ((myocard* or heart or card* or ST) adj3 (infarct* or isch?em*)) or (coronary intervent* or STEMI or PCI or angioplast* or post-isch* or postisch* or postinfarct* or post-infarct* or MI or AMI or myocard* revasc* or coronary artery bypass* or CABG or aortocoronary bypass* or coronary bypass*).tw,ot,kw.                                                                                                                                                       | 572593          |
| 11 | <b>9 or 10 [MI]</b>                                                                                                                                                                                                                                                                                                                                                                                                                                                   | <b>737611</b>   |
| 12 | (*shock/ or shock.ti.) not (exp heart stimulation/ or (septic or sepsis or bacter*em* or infect* or endotoxin* or heat shock or HSP* or anaphyl* or allergic or vasodilat* or osmotic or h?emorr* or bleeding or toxic or neurogen* or burn* or shock-wave or shock-resistant or hypovolemic or electroconvuls* or distributive shock*).ti.) [shock general]                                                                                                          | 32315           |
| 13 | forward heart failure/                                                                                                                                                                                                                                                                                                                                                                                                                                                | 5518            |
| 14 | ((low* or diminish* or decreas* or declin* or reduc* or negligibl* or fall*) adj2 (card* or heart) adj output*).tw,kw.                                                                                                                                                                                                                                                                                                                                                | 12569           |
| 15 | ((low* or diminish* or decreas* or declin* or reduc* or negligibl*) adj output*).tw,kw.                                                                                                                                                                                                                                                                                                                                                                               | 2964            |
| 16 | cardiac output low.tw,kw,ot.                                                                                                                                                                                                                                                                                                                                                                                                                                          | 105             |
| 17 | (LCOS or COS or LCO).tw,ot,kw.                                                                                                                                                                                                                                                                                                                                                                                                                                        | 20242           |
| 18 | ((instab* or unstab*) adj1 h?emodyn*).tw,kw.                                                                                                                                                                                                                                                                                                                                                                                                                          | 12677           |
| 19 | <b>or/12-18 [shock, low CO]</b>                                                                                                                                                                                                                                                                                                                                                                                                                                       | <b>81903</b>    |
| 20 | <b>11 and 19 [ II = MI + CO ]</b>                                                                                                                                                                                                                                                                                                                                                                                                                                     | <b>10001</b>    |
| 21 | <b>8 or 20 [ I II ]</b>                                                                                                                                                                                                                                                                                                                                                                                                                                               | <b>38501</b>    |
| 22 | (book or editorial).pt. or book/ or editorial/ or (((("review" or letter).pt. or "review"/ or letter/) not (meta analysis/ or "systematic review"/ or clinical study/ or case control study/ or exp controlled clinical trial/ or controlled study/ or intervention study/ or longitudinal study/ or major clinical study/ or prospective study/ or retrospective study/ or cohort analysis/ or (systematic adj2 (literature or review)).tw,ot,kw.))                  | 3896039         |
| 23 | ((animal/ or animal experiment/ or animal model/ or nonhuman/) not human/) or (porcine or piglet or pig or pigs or rat or rats or dogs or dog or canine).ti. or ph?eochrom*.mp.                                                                                                                                                                                                                                                                                       | 6420601         |
| 24 | <b>22 or 23</b>                                                                                                                                                                                                                                                                                                                                                                                                                                                       | <b>10059750</b> |
| 25 | <b>21 not 24 [ I II - humans not editorials, reviews]</b>                                                                                                                                                                                                                                                                                                                                                                                                             | <b>30861</b>    |
| 26 | *inotropic agent/ or inotropic agent/ae, ct, cb, cm, dt                                                                                                                                                                                                                                                                                                                                                                                                               | 6390            |
| 27 | *cardiotonic agent/ or cardiotonic agent/ae, ct, cb, cm, dt                                                                                                                                                                                                                                                                                                                                                                                                           | 2726            |
| 28 | catecholamine/ae, ct, cb, cm, dt                                                                                                                                                                                                                                                                                                                                                                                                                                      | 1671            |
| 29 | (cardiotonic* or inopressor* or inodilator*).tw,ot,kw.                                                                                                                                                                                                                                                                                                                                                                                                                | 3739            |

|    |                                                                                                                                                                                                                                                                                                                                                                                                                                                                                                                                               |               |
|----|-----------------------------------------------------------------------------------------------------------------------------------------------------------------------------------------------------------------------------------------------------------------------------------------------------------------------------------------------------------------------------------------------------------------------------------------------------------------------------------------------------------------------------------------------|---------------|
| 30 | (catecholamines or inotropes or vasopressors or ((catecholamine or inotrop* or vasopressor) adj3 (support or solution* or infusion* or dosing or dose* or dosage* or prescri* or "use" or therap* or treat* or cotreat* or administ* or requir* or need* or superior or first-line or "add" or added or addition or adding or receiv* or receipt or regimen* or alone or combin* or plus or compar* or vs or versus or assigned or allocat* or randomi?ed or effectiveness or efficacy or drug* or agent* or substance* or group))).tw,ot,kw. | 74053         |
| 31 | dopamine/ not (dopamine/ec not dopamine/ae, cb, cm, dt)                                                                                                                                                                                                                                                                                                                                                                                                                                                                                       | 80557         |
| 32 | (dopamin* or hydroxytyramin* or Intropin*).tw,ot,kw.                                                                                                                                                                                                                                                                                                                                                                                                                                                                                          | 189228        |
| 33 | dobutamine/ not (dobutamine/ec not dobutamine/ae, cb, cm, dt)                                                                                                                                                                                                                                                                                                                                                                                                                                                                                 | 23435         |
| 34 | dobutamin*.tw,ot,kw.                                                                                                                                                                                                                                                                                                                                                                                                                                                                                                                          | 12411         |
| 35 | noradrenalin/ not (noradrenalin/ec not noradrenalin/ae, cb, cm, dt)                                                                                                                                                                                                                                                                                                                                                                                                                                                                           | 114540        |
| 36 | (norepinephrin* or noradrenalin*).tw,ot,kw.                                                                                                                                                                                                                                                                                                                                                                                                                                                                                                   | 120459        |
| 37 | adrenalin/ not (adrenalin/ec not adrenalin/ae, cb, cm, dt)                                                                                                                                                                                                                                                                                                                                                                                                                                                                                    | 111164        |
| 38 | (epinephrin* or adrenalin*).tw,ot,kw.                                                                                                                                                                                                                                                                                                                                                                                                                                                                                                         | 83979         |
| 39 | milrinone/                                                                                                                                                                                                                                                                                                                                                                                                                                                                                                                                    | 7278          |
| 40 | milrinon*.tw,ot,kw.                                                                                                                                                                                                                                                                                                                                                                                                                                                                                                                           | 2706          |
| 41 | vasopressin/ not (vasopressin/ec not vasopressin/ad, cb, cm, dt)                                                                                                                                                                                                                                                                                                                                                                                                                                                                              | 29150         |
| 42 | vasopressin*.tw,ot,kw.                                                                                                                                                                                                                                                                                                                                                                                                                                                                                                                        | 41607         |
| 43 | simendan/                                                                                                                                                                                                                                                                                                                                                                                                                                                                                                                                     | 106           |
| 44 | (simendan or levosimend*).tw,ot,kw.                                                                                                                                                                                                                                                                                                                                                                                                                                                                                                           | 2165          |
| 45 | <b>or/26-44 [drugs]</b>                                                                                                                                                                                                                                                                                                                                                                                                                                                                                                                       | <b>549646</b> |
| 46 | <b>25 and 45 [total]</b>                                                                                                                                                                                                                                                                                                                                                                                                                                                                                                                      | <b>5721</b>   |
| 47 | <b>remove duplicates from 46 [total hits -deduplicated]</b>                                                                                                                                                                                                                                                                                                                                                                                                                                                                                   | <b>5640</b>   |
| 48 | (embase or elsevier or canadian).cr.                                                                                                                                                                                                                                                                                                                                                                                                                                                                                                          | 26116001      |
| 49 | <b>47 and 48 [ EMBASE records only]</b>                                                                                                                                                                                                                                                                                                                                                                                                                                                                                                       | <b>5261</b>   |

#### CENTRAL

| ID | Search                                                                                                                                                                                                                                                                                                                                                               | Hits         |
|----|----------------------------------------------------------------------------------------------------------------------------------------------------------------------------------------------------------------------------------------------------------------------------------------------------------------------------------------------------------------------|--------------|
| #1 | (cardiogen* near/9 shock*):ti,ab,kw                                                                                                                                                                                                                                                                                                                                  | 914          |
| #2 | (circulator* near/3 shock*):ti,ab,kw                                                                                                                                                                                                                                                                                                                                 | 36           |
| #3 | (coron* NEXT shock*):ti,ab,kw                                                                                                                                                                                                                                                                                                                                        | 0            |
| #4 | (acute NEXT circulatory NEXT fail*):ti,ab,kw                                                                                                                                                                                                                                                                                                                         | 14           |
| #5 | ((undifferent* or undiagnos* or different or various or variety or type or types or kind or kinds or forms or states or etiologies) near/2 shock*):ti,ab not (heat NEXT shock*):ti,ab                                                                                                                                                                                | 82           |
| #6 | <b>#1 or #2 or #3 or #4 or #5</b>                                                                                                                                                                                                                                                                                                                                    | <b>1036</b>  |
| #7 | <b>((myocard* or heart or card* or ST) near/3 (infarct* or isch*em*)) or ((coronary NEXT intervent*) or STEMI or PCI or angioplast* or (post NEXT isch*) or postisch* or postinfarct* or (post NEXT infarct*) or MI or AMI or (myocard* NEXT revasc*) or (coronary NEXT artery NEXT bypass*) or CABG or (aortocoronary NEXT bypass*) or (coronary NEXT bypass*))</b> | <b>57969</b> |
| #8 | shock:ti,kw not (septic or sepsis or bacter*em* or infect* or endotoxin* or (heat NEXT shock) or HSP* or anaphyl* or allergic or vasodilat* or osmotic or h*emorr* or bleeding or toxic or neurogen* or burn* or (shock NEXT wave) or (shock NEXT resistant) or hypovolemic or (hypo NEXT volemic) or electroconvuls* or (distributive NEXT shock*)):ti              | 2559         |

|     |                                                                                                                                                                                                                                                                                                                                                                                                                                                                                                                                                       |              |
|-----|-------------------------------------------------------------------------------------------------------------------------------------------------------------------------------------------------------------------------------------------------------------------------------------------------------------------------------------------------------------------------------------------------------------------------------------------------------------------------------------------------------------------------------------------------------|--------------|
| #9  | ((low* or diminish* or decreas* or declin* or reduc* or negligibl* or fall*) near/2 ((card* NEXT output) OR (heart NEXT output))):ti,ab,kw                                                                                                                                                                                                                                                                                                                                                                                                            | 1094         |
| #10 | ((low* or diminish* or decreas* or declin* or reduc* or negligibl*) next output*):ti,ab,kw                                                                                                                                                                                                                                                                                                                                                                                                                                                            | 138          |
| #11 | (LCOS or COS or LCO):ti,ab,kw                                                                                                                                                                                                                                                                                                                                                                                                                                                                                                                         | 312          |
| #12 | ((instab* or unstab*) near/1 h*emodyn*):ti,ab,kw                                                                                                                                                                                                                                                                                                                                                                                                                                                                                                      | 633          |
| #13 | <b>#8 or #9 or #10 #11 or #12</b>                                                                                                                                                                                                                                                                                                                                                                                                                                                                                                                     | <b>4238</b>  |
| #14 | <b>#7 and #13</b>                                                                                                                                                                                                                                                                                                                                                                                                                                                                                                                                     | <b>1078</b>  |
| #15 | <b>#6 or #14</b>                                                                                                                                                                                                                                                                                                                                                                                                                                                                                                                                      | <b>1595</b>  |
| #16 | (cardiotonic* or inopressor* or inodilator* or dopamin* or hydroxytyramin* or Intropin* or dobutamin* or norepinephrin* or noradrenalin* or epinephrin* or adrenalin* or milriron* or vasopressin* or simendan or levosimend*):ti,ab,kw                                                                                                                                                                                                                                                                                                               | 22220        |
| #17 | (catecholamines or inotropes or vasopressors or ((catecholamine or inotrop* or vasopressor) near/3 (support or solution* or infusion* or dosing or dose* or dosage* or prescri* or "use" or therap* or treat* or cotreat* or administ* or requir* or need* or superior or (first NEXT line) or "add" or added or addition or adding or receiv* or receipt or regimen* or alone or combin* or plus or compar* or vs or versus or assigned or allocat* or randomi*ed or effectiveness or efficacy or drug* or agent* or substance* or group))):ti,ab,kw | 4646         |
| #18 | <b>#16 or #17</b>                                                                                                                                                                                                                                                                                                                                                                                                                                                                                                                                     | <b>24628</b> |
| #19 | <b>#15 and #18</b>                                                                                                                                                                                                                                                                                                                                                                                                                                                                                                                                    | <b>277</b>   |

**SUPPLEMENTARY MATERIALS**

**Table S1.** Overall patient population and baseline characteristics of cardiogenic shock patients in the included studies.

| Study                | Overall patient population               | Criteria for therapy initiation |               | CS patients (n) |         | Age (years) |            | Male (%) |         | AMI (%) |         | Revascularization (%) |         |
|----------------------|------------------------------------------|---------------------------------|---------------|-----------------|---------|-------------|------------|----------|---------|---------|---------|-----------------------|---------|
|                      |                                          |                                 |               | Therapy         | Control | Therapy     | Control    | Therapy  | Control | Therapy | Control | Therapy               | Control |
|                      |                                          |                                 |               |                 |         |             |            |          |         |         |         |                       |         |
| <b>Adrenaline</b>    |                                          |                                 |               |                 |         |             |            |          |         |         |         |                       |         |
| Myburgh              | Requirement of vasopressor for any cause |                                 | Noradrenaline | 64              | 64      |             |            |          |         |         |         |                       |         |
| Tarvasmaki           | Acute CS                                 | CS                              | Non exposed   | 46              | 170     | 68±9        | 66±12      | 72       | 75      | 87      | 79      |                       |         |
| Levy                 | CS after AMI                             | CS                              | Noradrenaline | 27              | 30      | 68 [55-79]  | 66 [55-77] | 52       | 80      | 100     | 100     | 100                   | 100     |
| <b>Noradrenaline</b> |                                          |                                 |               |                 |         |             |            |          |         |         |         |                       |         |

|                    |                                          |                     |             |     |     |            |            |    |    |     |     |     |     |
|--------------------|------------------------------------------|---------------------|-------------|-----|-----|------------|------------|----|----|-----|-----|-----|-----|
| De Backer          | Shock, all-causes                        | First-line in shock | Dopamine    | 145 | 135 |            |            |    |    |     |     |     |     |
| Cronin             | AMI and CS                               | CS                  | Non exposed | 95  | 45  |            |            |    |    | 100 | 100 |     |     |
| Myburgh            | Requirement of vasopressor for any cause |                     | Adrenaline  | 64  | 64  |            |            |    |    |     |     |     |     |
| Yagi               | Cardiovascular shock                     |                     | Dopamine    | 98  | 142 |            |            |    |    |     |     |     |     |
| Tarvasmaki         | Acute CS                                 | CS                  | Non exposed | 162 | 54  |            |            |    |    |     |     |     |     |
| Levy               | CS after AMI                             | CS                  | Adrenaline  | 30  | 27  | 66 [55-77] | 68 [55-79] | 80 | 52 | 100 | 100 | 100 | 100 |
| <b>Vasopressin</b> |                                          |                     |             |     |     |            |            |    |    |     |     |     |     |
| Tarvasmaki         | Acute CS                                 | CS                  | Non exposed | 8   | 208 |            |            |    |    |     |     |     |     |
| <b>Milrinone</b>   |                                          |                     |             |     |     |            |            |    |    |     |     |     |     |

|                     |                                                                          |                      |             |    |    |            |            |    |    |     |     |     |     |
|---------------------|--------------------------------------------------------------------------|----------------------|-------------|----|----|------------|------------|----|----|-----|-----|-----|-----|
| Lewis               | CS, all etiologies                                                       | CS                   | Dobutamine  | 50 | 50 | 73 [59-81] | 75 [67-83] | 56 | 46 | 4   | 8   |     |     |
| <b>Levosimendan</b> |                                                                          |                      |             |    |    |            |            |    |    |     |     |     |     |
| Samimi-Fard         | STEMI with CS after PCI                                                  | CS                   | Dobutamine  | 11 | 11 | 65±12      | 63±11      | 86 | 75 | 100 | 100 | 100 | 100 |
| Fuhrmann            | Refractory CS <2hrs after PCI                                            | Refractory CS        | Enoximone   | 16 | 16 | 68 [60-70] | 68 [62-73] | 69 | 56 | 100 | 100 | 100 | 100 |
| Omerovic            | CS due to STEMI                                                          | Routine in CS        | Non exposed | 46 | 48 | 65±12      | 67±11      | 76 | 71 | 100 | 100 | 100 | 100 |
| <b>Huseby</b>       |                                                                          |                      |             |    |    |            |            |    |    |     |     |     |     |
| Huseby              | Clinical signs of HF <48hrs after pPCI treated acute STEMI, including CS | Clinical signs of HF | Placebo     | 4  | 5  |            |            |    |    | 100 | 100 | 100 | 100 |
| Christoph           | AMI and CS                                                               | CS, refractory       | IABP        | 10 | 12 | 68         | 66         | 50 | 67 | 100 | 100 | 100 | 100 |



to  
noradrenali  
ne +/-  
dobutamin  
e

|            |                         |                               |             |    |     |       |      |    |    |     |     |
|------------|-------------------------|-------------------------------|-------------|----|-----|-------|------|----|----|-----|-----|
| Affronti   | CS with VA-ECMO support | Prior to planned weaning ECMO | Non exposed | 6  | 11  | 57±9  | 57±8 | 67 | 62 | 50  | 45  |
| Katsytadze | AMI and CS              | CS, also infusion of dopamine | Non exposed | 12 | 15  |       |      |    |    | 100 | 100 |
| Caetano    | AMI and CS              |                               | Non exposed | 12 | 25  | 68±11 | 80±9 | 83 | 44 | 100 | 100 |
| Tarvasmaki | Acute CS                | CS                            | Non exposed | 52 | 164 |       |      |    |    |     |     |

|       |                         |  |         |    |    |       |       |    |    |    |    |  |  |
|-------|-------------------------|--|---------|----|----|-------|-------|----|----|----|----|--|--|
|       | ICU patients undergoing |  | Non     |    |    |       |       |    |    |    |    |  |  |
| Vally | VA-ECMO                 |  | exposed | 51 | 99 | 54±15 | 53±15 | 71 | 63 | 28 | 30 |  |  |

**Dobutamin**

e

|             |          |                                              |            |    |    |      |      |    |    |  |  |  |  |
|-------------|----------|----------------------------------------------|------------|----|----|------|------|----|----|--|--|--|--|
| El Mokhtari | Acute CS | CS,<br>refractory<br>to<br>dopamine<br>alone | Dopexamine | 10 | 10 | 62±8 | 66±6 | 60 | 70 |  |  |  |  |
|-------------|----------|----------------------------------------------|------------|----|----|------|------|----|----|--|--|--|--|

|             |                                                 |                         |                |    |    |               |      |    |    |     |     |  |  |
|-------------|-------------------------------------------------|-------------------------|----------------|----|----|---------------|------|----|----|-----|-----|--|--|
| Moulopoulos | CS post-MI, therapy<br>prior to IABP initiation | CS, therapy<br>pre-IABP | Non<br>exposed | 24 | 31 | 62±2/58<br>±5 | 60±2 | 92 | 84 | 100 | 100 |  |  |
|-------------|-------------------------------------------------|-------------------------|----------------|----|----|---------------|------|----|----|-----|-----|--|--|

|             |                         |    |              |    |    |       |       |    |    |     |     |     |     |
|-------------|-------------------------|----|--------------|----|----|-------|-------|----|----|-----|-----|-----|-----|
| Samimi-Fard | STEMI with CS after PCI | CS | Levosimendan | 11 | 11 | 63±11 | 65±12 | 75 | 86 | 100 | 100 | 100 | 100 |
|-------------|-------------------------|----|--------------|----|----|-------|-------|----|----|-----|-----|-----|-----|

|            |          |    |                |     |     |  |  |  |  |  |  |  |  |
|------------|----------|----|----------------|-----|-----|--|--|--|--|--|--|--|--|
| Tarvasmaki | Acute CS | CS | Non<br>exposed | 105 | 111 |  |  |  |  |  |  |  |  |
|------------|----------|----|----------------|-----|-----|--|--|--|--|--|--|--|--|

|                 |                      |                     |               |     |            |            |    |     |     |     |
|-----------------|----------------------|---------------------|---------------|-----|------------|------------|----|-----|-----|-----|
| Lewis           | CS, all etiologies   | Milrinone           | 50            | 50  | 75 [67-83] | 73 [59-81] | 46 | 56  | 8   | 4   |
| <b>Dopamine</b> |                      |                     |               |     |            |            |    |     |     |     |
| De Backer       | Shock, all-causes    | First-line in shock | Noradrenaline | 135 | 145        |            |    |     |     |     |
| Yagi            | Cardiovascular shock |                     | Noradrenaline | 142 | 98         |            |    |     |     |     |
| Andriange       | AMI, subgroup CS     | CS                  | Non exposed   | 34  | 11         |            |    | 100 | 100 | 0 0 |
| Tarvasmaki      | Acute CS             | CS                  | Non exposed   | 56  | 160        |            |    |     |     |     |

Values are presented as mean  $\pm$  standard deviation or as median [IQR]. Cardiogenic shock patients derived from overall cohort. Revascularization:

PCI/CABG. CS= cardiogenic shock; (A)MI= (acute) myocardial infarction; STEMI; ST-segment elevation myocardial infarction; (VA-)ECMO =

(venoarterial) extracorporeal membrane oxygenation; PCI= percutaneous coronary intervention; IABP=intraaortic balloon pump; HF=heart failure.



**Table S3.** Quality assessment of the included observational studies

|             | Study population clearly specified and | Cohort representative of CS population | Appropriate selection of control group | Therapy and control group selected from same/similar population | Key potential confounding variables measured and adjusted | Therapy and control group same criteria for initiation of treatment | Outcome measure was clearly defined, valid, reliable and implemented | Follow-up long enough for outcomes to occur (> 28 days) | Loss to follow-up after baseline 20% or less | Total quality score |
|-------------|----------------------------------------|----------------------------------------|----------------------------------------|-----------------------------------------------------------------|-----------------------------------------------------------|---------------------------------------------------------------------|----------------------------------------------------------------------|---------------------------------------------------------|----------------------------------------------|---------------------|
| Cronin      | ★                                      |                                        | ★                                      |                                                                 |                                                           |                                                                     |                                                                      | ★                                                       | Low                                          |                     |
| Yagi        | ★                                      |                                        | ★                                      |                                                                 |                                                           |                                                                     |                                                                      |                                                         | Low                                          |                     |
| Tarvasmaki  | ★                                      | ★                                      |                                        |                                                                 |                                                           |                                                                     | ★                                                                    | ★                                                       | ★                                            | Fair                |
| Andriange   | ★                                      | ★                                      |                                        | ★                                                               |                                                           | ★                                                                   | ★                                                                    | ★                                                       |                                              | Fair                |
| El Mokhtari | ★                                      |                                        |                                        | ★                                                               |                                                           | ★                                                                   | ★                                                                    | ★                                                       |                                              | Fair                |
| Moulopoulos | ★                                      |                                        | ★                                      |                                                                 |                                                           | ★                                                                   |                                                                      | ★                                                       |                                              | Fair                |
| Omerovic    | ★                                      |                                        |                                        | ★                                                               | ★                                                         |                                                                     | ★                                                                    | ★                                                       | ★                                            | Fair                |
| Christoph   | ★                                      |                                        | ★                                      | ★                                                               |                                                           |                                                                     |                                                                      |                                                         |                                              | Low                 |
| Affronti    | ★                                      |                                        |                                        | ★                                                               |                                                           | ★                                                                   | ★                                                                    |                                                         |                                              | Fair                |
| Katsytadze  |                                        |                                        |                                        |                                                                 |                                                           |                                                                     |                                                                      | ★                                                       |                                              | Low                 |
| Caetano     |                                        |                                        |                                        |                                                                 |                                                           |                                                                     |                                                                      |                                                         |                                              | Low                 |
| Lewis       | ★                                      |                                        | ★                                      | ★                                                               |                                                           |                                                                     | ★                                                                    |                                                         | ★                                            | Fair                |
| Vally       | ★                                      |                                        |                                        | ★                                                               | ★                                                         |                                                                     | ★                                                                    |                                                         |                                              | Fair                |

Total quality score grading: low quality = 0-3 stars; fair quality = 4-6 stars, high quality = 7-9 stars

**Table S4.** Mortality outcomes for cardiogenic shock population.

| Study                | CS patient population          | Control arm   | Short-term mortality  |             |             | Long-term mortality |             |             |
|----------------------|--------------------------------|---------------|-----------------------|-------------|-------------|---------------------|-------------|-------------|
|                      |                                |               | Definition            | Therapy     | Control     | Definition          | Therapy     | Control     |
| <b>Adrenaline</b>    |                                |               |                       |             |             |                     |             |             |
| Myburgh              | Acute circulatory failure      | Noradrenaline | 28-day                | 15/64 (23)  | 17/63 (27)  | 90-day              | 20/62 (32)  | 25/61 (41)  |
| Tarvasmaki           | CS, 81% ACS                    | Non exposed   |                       |             |             | 90-day              | 34/46 (74)  | 54/170 (32) |
| Levy                 | CS after AMI                   | Noradrenaline | 28-day                | 13/27 (48)  | 8/30 (27)   |                     |             |             |
| <b>Noradrenaline</b> |                                |               |                       |             |             |                     |             |             |
| De Backer            | CS, % AMI ns                   | Dopamine      | 28-day                | 50/145 (34) | 64/135 (47) |                     |             |             |
| Cronin               | CS and AMI                     | Non exposed   |                       |             |             | ns                  | 79/95 (83)  | 37/45 (82)  |
| Myburgh              | Acute circulatory failure      | Adrenaline    | 28-day                | 17/63 (27)  | 15/64 (23)  | 90-day              | 25/61 (41)  | 20/62 (32)  |
| Yagi                 | Cardiovascular shock, % AMI ns | Dopamine      | Acute mortality rates | 26/98 (27)  | 36/142 (25) |                     |             |             |
| Tarvasmaki           | CS, 81% ACS                    | Non exposed   |                       |             |             | 90-day              | 76/162 (47) | 13/54 (24)  |
| Levy                 | CS after AMI                   | Adrenaline    | 28-day                | 8/30 (27)   | 13/27 (48)  |                     |             |             |

| Vasopressin  |                                                                   |             |             |            |            |         |            |             |
|--------------|-------------------------------------------------------------------|-------------|-------------|------------|------------|---------|------------|-------------|
| Tarvasmaki   | CS, 81% ACS                                                       | Non exposed |             |            |            | 90-day  | 7/8 (88)   | 81/208 (39) |
| Milrinone    |                                                                   |             |             |            |            |         |            |             |
| Lewis        | CS, all etiologies (4-8% AMI)                                     | Dobutamine  | In-hospital | 1/50 (2)   |            |         | 5/50 (10)  |             |
| Levosimendan |                                                                   |             |             |            |            |         |            |             |
| Samimi-Fard  | STEMI, CS after PCI                                               | Dobutamine  |             |            |            | 1-year  | 3/11 (27)  | 1/11 (9)    |
| Fuhrmann     | Refractory CS post-MI                                             | Enoximone   | 30-day      | 5/16 (31)  |            |         | 11/16 (69) |             |
| Omerovic     | CS due to STEMI                                                   | Non exposed | 30-day      | 15/46 (33) | 17/48 (35) | 1-year  | 20/46 (43) | 17/48 (35)  |
| Huseby       | CS and clinical signs of HF <48hrs after pPCI treated acute STEMI | Placebo     |             |            |            | 6-month | 1/4 (25)   | 2/5 (40)    |
| Christoph    | AMI and CS                                                        | IABP        | ns          | 3/10 (30)  |            |         | 3/12 (25)  |             |
| Affronti     | VA-ECMO supported CS patients                                     | Non exposed | In-hospital | 2/6 (33)   |            |         | 7/11 (64)  |             |
| Katsytadze   | AMI and CS                                                        | Non exposed |             |            |            | 1-year  | 4/12 (33)  | 8/15 (53)   |
| Caetano      | AMI and CS                                                        | Non exposed | In-hospital | 8/12 (67)  |            |         | 17/25 (68) |             |

|            |             |             |  |  |  |        |               |             |
|------------|-------------|-------------|--|--|--|--------|---------------|-------------|
| Tarvasmaki | CS, 81% ACS | Non exposed |  |  |  | 90-day | 17/52<br>(33) | 72/164 (44) |
|------------|-------------|-------------|--|--|--|--------|---------------|-------------|

|       |                                        |             |        |               |               |  |  |  |
|-------|----------------------------------------|-------------|--------|---------------|---------------|--|--|--|
| Vally | ICU patients<br>undergoing VA-<br>ECMO | Non exposed | 30-day | 11/51<br>(22) | 50/99<br>(51) |  |  |  |
|-------|----------------------------------------|-------------|--------|---------------|---------------|--|--|--|

### Dobutamine

|             |                    |            |        |          |          |        |              |           |
|-------------|--------------------|------------|--------|----------|----------|--------|--------------|-----------|
| El Mokhtari | Acute CS, % AMI ns | Dopexamine | 24-hrs | 0/10 (0) | 0/10 (0) | 1-year | 3/10<br>(30) | 4/10 (40) |
|-------------|--------------------|------------|--------|----------|----------|--------|--------------|-----------|

|             |                                                    |             |         |               |               |  |  |  |
|-------------|----------------------------------------------------|-------------|---------|---------------|---------------|--|--|--|
| Moulopoulos | CS post-MI, therapy<br>prior to IABP<br>initiation | Non exposed | 1-month | 20/24<br>(83) | 21/31<br>(68) |  |  |  |
|-------------|----------------------------------------------------|-------------|---------|---------------|---------------|--|--|--|

|             |                     |                  |  |  |  |        |          |           |
|-------------|---------------------|------------------|--|--|--|--------|----------|-----------|
| Samimi-Fard | STEMI, CS after PCI | Levosimenda<br>n |  |  |  | 1-year | 1/11 (9) | 3/11 (27) |
|-------------|---------------------|------------------|--|--|--|--------|----------|-----------|

|            |             |             |  |  |  |        |                |             |
|------------|-------------|-------------|--|--|--|--------|----------------|-------------|
| Tarvasmaki | CS, 81% ACS | Non exposed |  |  |  | 90-day | 50/105<br>(48) | 39/111 (35) |
|------------|-------------|-------------|--|--|--|--------|----------------|-------------|

|       |                    |           |             |           |          |  |  |  |
|-------|--------------------|-----------|-------------|-----------|----------|--|--|--|
| Lewis | CS, all etiologies | Milrinone | In-hospital | 5/50 (10) | 1/50 (2) |  |  |  |
|-------|--------------------|-----------|-------------|-----------|----------|--|--|--|

### Dopamine

|           |              |                   |        |                |                |  |  |  |
|-----------|--------------|-------------------|--------|----------------|----------------|--|--|--|
| De Backer | CS, % AMI ns | Noradrenalin<br>e | 28-day | 64/135<br>(47) | 50/145<br>(34) |  |  |  |
|-----------|--------------|-------------------|--------|----------------|----------------|--|--|--|

|      |                                   |                   |                             |                |               |  |  |  |
|------|-----------------------------------|-------------------|-----------------------------|----------------|---------------|--|--|--|
| Yagi | Cardiovascular<br>shock, % AMI ns | Noradrenalin<br>e | Acute<br>mortality<br>rates | 36/142<br>(25) | 26/98<br>(27) |  |  |  |
|------|-----------------------------------|-------------------|-----------------------------|----------------|---------------|--|--|--|

|           |                          |             |        |               |                |        |               |             |
|-----------|--------------------------|-------------|--------|---------------|----------------|--------|---------------|-------------|
| Andriange | 100% AMI,<br>subgroup CS | Non exposed | 30-day | 26/34<br>(76) | 11/11<br>(100) | 1-year | 27/30<br>(90) | 11/11 (100) |
|-----------|--------------------------|-------------|--------|---------------|----------------|--------|---------------|-------------|



|            |             |             |        |               |             |
|------------|-------------|-------------|--------|---------------|-------------|
| Tarvasmaki | CS, 81% ACS | Non exposed | 90-day | 24/56<br>(43) | 67/160 (42) |
|------------|-------------|-------------|--------|---------------|-------------|

---

*Definitions: mortality= short-term <90 day and long-term ≥ 90-day, (n; number of events/ total at risk (%)); ns=not specified; CS= cardiogenic shock; ACS= acute coronary syndrome; (A)MI= (acute) myocardial infarction; STEMI= ST-segment elevation myocardial infarction; (p)PCI= (primary) percutaneous coronary intervention; HF= heart failure; (VA-)ECMO= (venoarterial) extracorporeal membrane oxygenation; ICU= intensive care unit; IABP= intraaortic balloon pump; HF= heart failure.*

**Table S5.** Primary and secondary outcome(s) of the included studies.

| Study                | Patient population                       | Therapy       | Primary end-point               | Results                                                                                                        | Secondary outcome(s)                                                                                                                               |
|----------------------|------------------------------------------|---------------|---------------------------------|----------------------------------------------------------------------------------------------------------------|----------------------------------------------------------------------------------------------------------------------------------------------------|
| <b>Adrenaline</b>    |                                          |               |                                 |                                                                                                                |                                                                                                                                                    |
| Myburgh              | Requirement of vasopressor for any cause | Noradrenaline | Achievement of MAP goal > 24hrs | Similar median time to achieving MAP goal and number of vasopressor-free days.                                 | Adrenaline use associated with development tachycardia and lactic acidosis in first 24hrs.                                                         |
| Tarvasmaki           | Acute CS                                 | Non exposed   | 90-day mortality                | Adrenaline use associated with excess 90-day mortality.                                                        | Adrenaline use associated with increase of cardiovascular and renal biomarkers (i.e. hsTnT, Nt-proBNP and creatinine). Similar CI and BP by 96hrs. |
| Levy                 | CS after AMI                             | Noradrenaline | CI evolution and refractory CS  | Similar CI evolution, early termination of study due to higher incidence of refractory CS in adrenaline group. | Similar incidence of arrhythmias, higher incidence of refractory CS in adrenaline group.                                                           |
| <b>Noradrenaline</b> |                                          |               |                                 |                                                                                                                |                                                                                                                                                    |
| De Backer            | Shock, all-causes                        | Dopamine      | 28-day mortality                | Higher mortality rate in dopamine group (subgroup analysis in CS population; p=0.03).                          | Dopamine was associated with more arrhythmic events.                                                                                               |

|                    |                                          |             |                                      |                                                                                                                |                                                                                            |
|--------------------|------------------------------------------|-------------|--------------------------------------|----------------------------------------------------------------------------------------------------------------|--------------------------------------------------------------------------------------------|
| Cronin             | AMI and CS                               | Non exposed | Annual incidence of CS over a decade | Annual incidence of CS after AMI decreased, but annual mortality of AMI remained unaltered.                    |                                                                                            |
| Myburgh            | Requirement of vasopressor for any cause | Adrenaline  | Achievement of MAP goal > 24hrs      | Similar median time to achieving MAP goal and number of vasopressor-free days.                                 | Adrenaline use associated with development tachycardia and lactic acidosis in first 24hrs. |
| Yagi               | Cardiovascular shock                     | Dopamine    | 30-day mortality                     | Acute mortality rates were significantly lower in dopamine group.                                              |                                                                                            |
| Tarvasmaki         | Acute CS                                 | Non exposed | 90-day mortality (adrenaline)        |                                                                                                                |                                                                                            |
| Levy               | CS after AMI                             | Adrenaline  | CI evolution and refractory CS       | Similar CI evolution, early termination of study due to higher incidence of refractory CS in adrenaline group. | Similar incidence of arrhythmias, higher incidence of refractory CS in adrenaline group.   |
| <b>Vasopressin</b> |                                          |             |                                      |                                                                                                                |                                                                                            |
| Tarvasmaki         | Acute CS                                 | Non exposed | 90-day mortality (adrenaline)        |                                                                                                                |                                                                                            |
| <b>Milrinone</b>   |                                          |             |                                      |                                                                                                                |                                                                                            |
| Lewis              | CS, all etiologies                       | Dobutamine  | Time to resolution of CS             | No differences in time to CS resolution, hemodynamic                                                           | Similar length of ICU stay. More development of arrhythmias in                             |

stabilization (MAP, HR, CI, SvO<sub>2</sub>) and incidence of inotrope failure. dobutamine group (63% vs 33%, p<0.01).

### Levosimendan

|             |                                                                          |             |                                   |                                                                 |                                                                                                                                                                                                             |
|-------------|--------------------------------------------------------------------------|-------------|-----------------------------------|-----------------------------------------------------------------|-------------------------------------------------------------------------------------------------------------------------------------------------------------------------------------------------------------|
| Samimi-Fard | STEMI with CS after PCI                                                  | Dobutamine  | Cardiac death                     | No differences in long-term survival.                           | Greater LVEF after 24 hrs with levosimendan treatment (55 ±8 vs. 45 ±6, p<0.01, no difference at baseline).                                                                                                 |
| Fuhrmann    | Refractory CS <2hrs after PCI                                            | Enoximone   | 30-day mortality                  | Higher mortality rate in enoximone group vs levosimendan group. | No differences in invasive hemodynamic parameters at 48 hrs, incidence of rhythm disorders or diuretics. MOF leading to death occurred only in enoximone group (N=4/16), mostly due to acute renal failure. |
| Omerovic    | CS due to STEMI                                                          | Non exposed | ns                                | Similar mortality rates at 30-day and 1-year.                   | No differences in incidence new-onset AF, in-hospital CA and length of CCU stay.                                                                                                                            |
| Huseby      | Clinical signs of HF <48hrs after pPCI treated acute STEMI, including CS | Placebo     | Change in WMSI (baseline - day 5) | Greater WMSI improvement in levosimendan group.                 | No differences in changes of NT-proBNP levels, incidence ventricular arrhythmia, AF, infarct size at 6 wk or new clinical event at 6 mth.                                                                   |

|            |                                 |             |                               |                                                                                                                                         |                                                                                                                               |
|------------|---------------------------------|-------------|-------------------------------|-----------------------------------------------------------------------------------------------------------------------------------------|-------------------------------------------------------------------------------------------------------------------------------|
| Christoph  | AMI and CS                      | IABP        | Hemodynamic effects           | Similar increase in CI and after 24/48 hrs MAP above target in both groups.                                                             | No therapy related complications, no differences in SOFA score at day 1, 2, 3. Three patients died due to MOF in both groups. |
| Affronti   | CS with VA-ECMO support         | Non exposed | Weaning outcome ECMO-support  | Levosimendan 83% weaning rate vs 27% in non-levosimendan group (p=0.05).                                                                | Similar length of ICU stay and number of patients requiring dialysis for acute renal failure.                                 |
| Katsytadze | AMI and CS                      | Non exposed | Hemodynamic effects           | Levosimendan group higher GFR, ESV and CI at 12 mth, no differences in HR and EF.                                                       |                                                                                                                               |
| Caetano    | AMI and CS                      | Non exposed | Follow-up regarding MACCE     | No difference in MACCE incidence (60.0% vs 50.0%; p = 0.73), namely in re-hospitalization due to heart failure (0% vs 14.3%; p = 0.43). | No differences regarding coronary artery disease severity, incidence of cardio-renal syndrome or in-hospital mortality.       |
| Tarvasmaki | Acute CS                        | Non exposed | 90-day mortality (adrenaline) |                                                                                                                                         |                                                                                                                               |
| Vally      | ICU patients undergoing VA-ECMO | Non exposed | Impact on VA-ECMO weaning     | Levosimendan 82% weaning rate vs 62% in non-levosimendan group (p=0.01)                                                                 | No difference in 30-day mortality after propensity-matching.                                                                  |

### Dobutamine

|             |                                              |              |                                   |                                                                                                                                                                        |                                                                                                                                                                                                      |
|-------------|----------------------------------------------|--------------|-----------------------------------|------------------------------------------------------------------------------------------------------------------------------------------------------------------------|------------------------------------------------------------------------------------------------------------------------------------------------------------------------------------------------------|
| El Mokhtari | Acute CS                                     | Dopexamine   | Hemodynamic effects               | No difference in hemodynamic effects after 24 hrs (CI, PAP, PCWP, HR, MAP) or myocardial oxygen consumption.                                                           | No difference in incidence renal dysfunction or requirement CVVH.                                                                                                                                    |
| Moulopoulos | CS post-MI, therapy prior to IABP initiation | Non exposed  | 1-month survival and IABP weaning | None of the 17 patients in the high-dose dobutamine group could be weaned, while 4/7 patients in the low-dose and 10/31 patients in the nondobutamine groups survived. | Difference in urine output between non-dobutamine and high-dose dobutamine group (respectively, 8.0 ±1.3 vs 2.0 ±0.9 mL/hr). No difference in hemodynamic effects (HR, intraarterial SBP, CVP, PWP). |
| Samimi-Fard | STEMI with CS after PCI                      | Levosimendan | Cardiac death                     | No differences in long-term survival.                                                                                                                                  | Greater LVEF after 24 hrs with levosimendan treatment (no difference at baseline).                                                                                                                   |
| Tarvasmaki  | Acute CS                                     | Non exposed  | 90-day mortality (adrenaline)     |                                                                                                                                                                        |                                                                                                                                                                                                      |
| Lewis       | CS, all etiologies                           | Milrinone    | Time to resolution of CS          | No differences in time to CS resolution, hemodynamic stabilization (MAP, HR, CI, SvO2) and incidence of inotrope failure.                                              | Similar length of ICU stay. More development of arrhythmias in dobutamine group (63% vs 33%, p<0.01).                                                                                                |

## Dopamine

|            |                      |               |                                            |                                                                                                                     |                                                                                                          |
|------------|----------------------|---------------|--------------------------------------------|---------------------------------------------------------------------------------------------------------------------|----------------------------------------------------------------------------------------------------------|
| De Backer  | Shock, all-causes    | Noradrenaline | 28-day mortality                           | Higher mortality rate in dopamine group (subgroup analysis in CS population; p=0.03).                               | Dopamine was associated with more arrhythmic events.                                                     |
| Yagi       | Cardiovascular shock | Noradrenaline | 30-day mortality                           | Acute mortality rates were significantly lower in dopamine group.                                                   |                                                                                                          |
| Andriange  | AMI, subgroup CS     | Non exposed   | Incidence and prognosis of shock after AMI | Of the 450 cases of AMI, 17.5% (10% CS) developed shock. CS had a worse prognosis compared to other types of shock. | Patients treated with dopamine frequently showed increase in BP and diureses, but also more arrhythmias. |
| Tarvasmaki | Acute CS             | Non exposed   | 90-day mortality (adrenaline)              |                                                                                                                     |                                                                                                          |

---

*Definitions: ns= not specified; CS= cardiogenic shock; MAP= mean arterial pressure; ACS= acute coronary syndrome; CI= cardiac index; (S)BP= (systolic) blood pressure; (A)MI= (acute) myocardial infarction; HR= heart rate; SvO2= mixed venous oxygen saturation; ICU= intensive care unit; STEMI= ST-segment elevation myocardial infarction; (p)PCI= (primary) percutaneous coronary intervention; (LV)E = (left ventricular) ejection fraction; HF= heart failure; MOF= multi-organ failure; AF= atrial fibrillation; CA= cardiac arrest; CCU= coronary care unit; WMSI= wall motion score index; IABP= intraaortic balloon pump; SOFA= sequential organ failure assessment; (VA-)ECMO= (venoarterial) extracorporeal membrane oxygenation; GFR= glomerular filtration rate; ESV= end systolic volume; MACCE= major adverse cardiac and cerebrovascular events; PAP= pulmonary arterial pressure ;P(C)WP= pulmonary (capillary) wedge pressure ;CVVH= continuous venovenous hemofiltration ;CVP= central venous pressure.*
